# Supplementary material
Source: PubMed Central journal article supplement (PMC3324808)
Supplement: 10.3163.1536-5050.100.2.010.sg001.pdf [file 10.3163.1536-5050.100.2.010.sg001.pdf]

## Comparing patient characteristics, type of intervention, control, and outcome (PICO) queries with unguided searching: a randomized controlled crossover trial

Arjen Hoogendam; Pieter F. de Vries Robbé, PhD; A. John P. M. Overbeke, PhD

**Table 1**

Question in Dutch, English translation, and the number of relevant articles referenced in the selected Cochrane review

| Question number | Question (Dutch)                                                                                                                                                       | Question (Translated)                                                                                                                                                      | Number of relevant articles |
|-----------------|------------------------------------------------------------------------------------------------------------------------------------------------------------------------|----------------------------------------------------------------------------------------------------------------------------------------------------------------------------|-----------------------------|
| 1               | Is chirurgie zinvol voor de behandeling van morbide obesitas?                                                                                                          | Is surgery useful for the treatment of morbid obesity?                                                                                                                     | 45                          |
| 2               | Is een vaste subcutane dosis laag molecuair heparine beter dan een aangepaste dosis ongefractioneerde heparine bij de behandeling van veneuze trombose of longembolie? | Is a fixed dose subcutaneous low molecular weight heparin better than an adjusted dose unfractionated heparin in the treatment of venous thrombosis or pulmonary embolism? | 26                          |
| 3               | Is een verandering van vet in de voeding zinvol om cardiovasculaire ziekte te voorkomen?                                                                               | Is a change in dietary fat useful to prevent cardiovascular disease?                                                                                                       | 89                          |
| 4               | Is het advies om zout in het dieet te minderen zinvol voor de preventie van cardiovasculaire ziekte?                                                                   | Is the advice to reduce salt content of the diet useful for the prevention of cardiovascular disease?                                                                      | 43                          |
| 5               | Is laag molecuair heparine beter dan orale antistolling voor de lange termijnbehandeling van thromboembolieën bij patiënten met kanker?                                | Is low molecular weight heparin better than an oral anticoagulant for the long-term treatment of thromboembolism in patients with cancer?                                  | 7                           |
| 6               | Is magnesium suppletie zinvol als behandeling van primaire hypertensie bij volwassenen?                                                                                | Is magnesium supplementation useful in the treatment of primary hypertension in adults?                                                                                    | 11                          |
| 7               | Is trombolysie beter dan anticoagulantia voor de behandeling van acute diepe veneuze trombose?                                                                         | Is thrombolysis better than anticoagulants for the treatment of acute deep vein thrombosis?                                                                                | 18                          |
| 8               | Is trombolysie zinvol voor de behandeling van acute massale longembolie?                                                                                               | Is thrombolysis useful for the treatment of acute massive pulmonary embolism?                                                                                              | 8                           |
| 9               | Kunnen orale anticoagulantia recidieven voorkomen na een ischemisch CVA of TIA van niet cardiale origine?                                                              | Can oral anticoagulants prevent recurrences after an ischemic stroke or transient ischemic attack (TIA) of noncardiac origin?                                              | 9                           |
| 10              | Resulteren dieetadviezen in blijvende verandering van het voedingspatroon of verbetering van het cardiovasculaire risicoprofiel bij gezonde volwassenen?               | Does dietary advice result in lasting changes in diet and improvement of the cardiovascular risk in healthy adults?                                                        | 60                          |

| Question number | Question (Dutch)                                                                                                                                                                          | Question (Translated)                                                                                                                                                   | Number of relevant articles |
|-----------------|-------------------------------------------------------------------------------------------------------------------------------------------------------------------------------------------|-------------------------------------------------------------------------------------------------------------------------------------------------------------------------|-----------------------------|
| 11              | Resulteren inspanningsoefeningen in gewichtsreductie bij mensen met overgewicht of obesitas?                                                                                              | Does exercise result in weight reduction in the overweight or obese?                                                                                                    | 42                          |
| 12              | Wat is de optimale duur van behandeling met vitamine K antagonisten bij patiënten met symptomatische veneuze tromboembolie?                                                               | What is the optimal duration of treatment with vitamin K antagonists in patients with symptomatic venous thromboembolism?                                               | 8                           |
| 13              | Zijn elastische kousen ter voorkoming van diepe veneuze trombose zinvol?                                                                                                                  | Are elastic stockings useful to prevent deep vein thrombosis?                                                                                                           | 15                          |
| 14              | Zijn laag moleculair heparine of heparinoiden beter dan standaard ongefractioneerde heparine voor de behandeling van een acuut ischemisch CVA?                                            | Are low molecular weight heparin or heparinoids better than standard unfractionated heparin for treatment of acute ischemic stroke?                                     | 7                           |
| 15              | Zijn omega 3 vetzuren zinvol voor de preventie van cardiovasculaire ziekte?                                                                                                               | Are omega 3 fatty acids useful for the prevention of cardiovascular disease?                                                                                            | 129                         |
| 16              | Zijn orale anticoagulantia beter dan plaatjesaggregatieremmers bij de behandeling van arteria carotis dissectie?                                                                          | Are anticoagulants better than antiplatelet agents for the treatment of carotid artery dissection?                                                                      | 27                          |
| 17              | Zijn orale anticoagulantia beter dan plaatjesaggregatieremmers om een CVA te voorkomen in patiënten met niet klepgerelateerd atrium fibrilleren zonder CVA of TIA in de voorgeschiedenis? | Are anticoagulants better than antiplatelet agents to prevent stroke in patients with non-valve-related atrial fibrillation without prior stroke or TIA in the history? | 7                           |
| 18              | Zijn orale vasodilatoire middelen zinvol bij het primair Raynaud's fenomeen?                                                                                                              | Are oral vasodilator agents useful in primary Raynaud's phenomenon?                                                                                                     | 8                           |
| 19              | Zijn remmers van het angiotensine convertering enzym (ACE) zinvol voor de behandeling van primaire hypertensie?                                                                           | Are inhibitors of angiotensin converting enzyme (ACE) useful for the treatment of primary hypertension?                                                                 | 96                          |
| 20              | Zijn vitamine K antagonisten beter dan laag moleculair heparine voor de lange termijn behandeling van symptomatische veneuze tromboembolie?                                               | Are vitamin K antagonists better than low molecular weight heparin for the long-term treatment of symptomatic venous thromboembolism?                                   | 6                           |
